# Supplementary material for: EPR and electrochemical interpretation of bispyrazolylacetate anchored Ni(ii) and Mn(ii) complexes: cytotoxicity and anti-proliferative activity towards human cancer cell lines
Source: Royal Society of Chemistry journal article supplement (doi:10.1039/c8nj01033a), 2018-01-01
Supplement: c8nj01033a1.pdf [file c8nj01033a1.pdf]

**Electronic Supplementary Information**

**EPR and electrochemical interpretation of bispyrazolylacetate  
anchored Ni(II) and Mn(II) complexes: Cytotoxicity and anti-  
proliferative activity on human cancer cell lines**

Kuheli Das,<sup>a</sup> Belete B. Beyene,<sup>a,b</sup> Amitabha Datta,<sup>\*a</sup> Eugenio Garribba,<sup>c</sup> Catarina

Roma-Rodrigues,<sup>d</sup> Ana Silva,<sup>d</sup> Alexandra R. Fernandes,<sup>\*d</sup> Chen-Hsiung Hung<sup>\*a</sup>

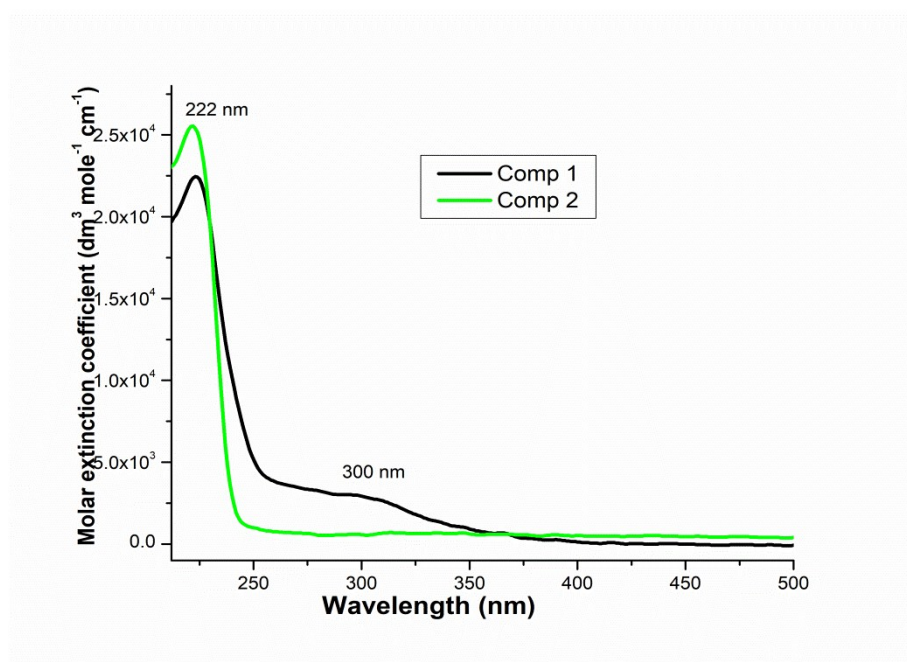

**Figure S1.** The UV-vis spectra for compounds **1** and **2**.

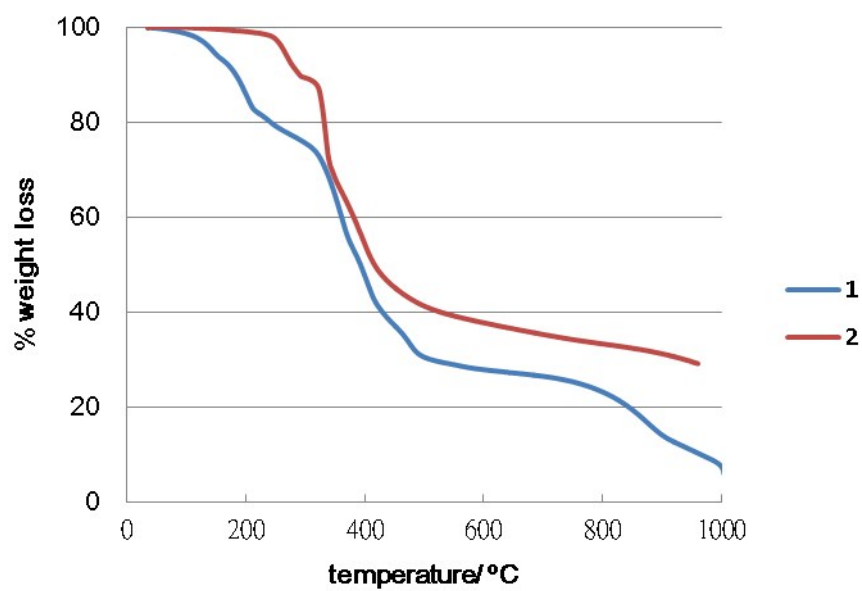

**Figure S2.** The TGA curves of compounds **1** and **2**.
